# Supplementary material
Source: publisher site journal article supplement (https://www.dovepress.com/get_supplementary_file.php?f=478540.docx)
Supplement: Supplementary file 1 [file get_supplementary_file.php]

| **Patients (N=37)** | **Values** |
| --- | --- |
| **Median age** (year, (range)) | 8.5 (1-15) |
| **Gender** |  |
| - Male (N, (percent)) | 20 (54) |
| - Female (N, (percent)) | 17 (46) |
| **Underlying condition** |  |
| - Congenital heart disease with prosthetic shunt (N, (percent)) | 23 (62.2) |
| - Moyamoya disease (N, (percent)) | 5 (13.5) |
| - Arterial ischemic stroke (N, (percent)) | 6 (16.2) |
| - Thalassemia post splenectomy (N, (percent)) | 2 (5.4) |
| - Renal artery stenosis with arterial stent (N, (percent)) | 1 (2.7) |

**Supplementary Table 1:** Summary of patients characteristics

**Supplementary Table 2**: Patients characteristics and results of IA, PFA-200, BT

| **No** | **Sex** | **Age (yr)** | **BW (kg.)** | **Diagnosis** | **Aspirin dose** | | **IA (ohms)*** | | **PFA-200 (secs)**** | | **BT(min)** † |
| --- | --- | --- | --- | --- | --- | --- | --- | --- | --- | --- | --- |
| mg. | /kg. | Arachidonic | ADP | Col/epi | Col/ADP |
| 1 | M | 7 | 41.8 | Acute ischemic stroke | 162 | 3.9 | 0 | 10 | 112 | 51 | 5 |
| 2 | F | 14 | 88 | Acute ischemic stroke | 300 | 3.4 | 0 | 14 | >300 | >300 | 2.5 |
| 3 | F | 15 | 40.5 | CCHD s/p MBTS | 162 | 4.0 | 1 | 6 | >300 | 190 | 5 |
| 4 | M | 2 | 17.5 | CCHD s/p MBTS | 81 | 4.6 | 1 | 2 | >300 | 119 | 3 |
| 5 | F | 11 | 45.4 | Acute ischemic stroke | 81 | 1.8 | 1 | 11 | >300 | 112 | 5 |
| 6 | F | 10 | 19.6 | CCHD s/p correction | 81 | 4.1 | 0 | 3 | >294 | >273 | 4 |
| 7 | F | 14 | 34 | Acute ischemic stroke | 300 | 8.8 | 0 | 2 | >300 | >300 | >15 |
| 9 | F | 11 | 28.2 | CCHD s/p MBTS | 121.5 | 4.3 | 1 | 2 | >300 | >300 | 15 |
| 10 | F | 6 | 21.5 | CCHD s/p MBTS | 81 | 3.8 | 0 | 1 | >300 | >300 | 1.5 |
| 11 | M | 2 | 9.7 | CCHD s/p MBTS | 40.5 | 4.2 | 1 | 5 | 246 | 170 | 3 |
| 12 | M | 9 | 39 | Acute ischemic stroke | 121.5 | 3.1 | 0 | NA | >300 | 109 | 9.5 |
| 13 | M | 5 | 16.2 | Renal artery stenosis | 81 | 5.0 | 0 | NA | >300 | 118 | 5 |
| 14 | M | 11 | 42.9 | CCHD s/p MBTS | 162 | 3.8 | 0 | 8 | >300 | >300 | 10 |
| 15 | F | 8 | 25 | CCHD s/p MBTS | 81 | 3.2 | 2 | 1 | >300 | >300 | 3 |
| 16 | F | 9 | 25.3 | Β-thal/HbE s/p splenectomy | 81 | 3.2 | 17 | 16 | 165 | 81 | 7 |
| 17 | M | 10 | 23.8 | CCHD s/p MBTS | 81 | 3.4 | 0 | 2 | >300 | 163 | 8.5 |
| 18 | M | 15 | 52.2 | CCHD s/p MBTS | 162 | 3.1 | 0 | 3 | >300 | >300 | 6 |
| 19 | M | 5 | 19.4 | CCHD s/p MBTS | 81 | 4.2 | 1 | 19 | 133 | 123 | 4 |
| 21 | M | 8 | 20.4 | CCHD s/p MBTS | 81 | 4.0 | 1 | 6 | >300 | 111 | 3 |
| 22 | F | 10 | 21.9 | HS s/p splenectomy | 81 | 3.7 | 0 | 16 | >300 | >300 | 5.5 |
| 23 | F | 7 | 20.6 | CCHD s/p MBTS | 81 | 3.9 | 0 | 7 | >300 | >300 | 5.5 |
| 24 | F | 11 | 21.7 | CCHD s/p MBTS | 81 | 3.7 | 1 | 2 | >300 | >300 | 7.5 |
| 25 | M | 15 | 28.1 | CCHD s/p Glen | 121.5 | 4.3 | 1 | 2 | >300 | >300 | 2.5 |
| 26 | M | 10 | 21.1 | CCHD s/p Glen | 81 | 3.8 | 1 | 2 | 134 | 92 | 4 |
| 27 | M | 2 | 11.4 | CCHD s/p MBTS | 40.5 | 3.6 | 0 | 1 | >300 | >300 | 4 |
| 28 | M | 6 | 17.9 | CCHD, PDA s/p PDA ligation | 81 | 4.5 | 0 | 2 | >300 | >300 | 4 |
| 29 | F | 6 | 17.5 | CCHD s/p MBTS | 81 | 4.6 | 0 | 11 | 174 | 150 | 8.5 |
| 30 | M | 2 | 13.8 | CCHD s/p MBTS | 40.5 | 2.9 | 1 | 4 | >300 | >300 | 7.5 |
| 31 | F | 10 | 54.9 | Acute ischemic stroke | 81 | 1.5 | 0 | 13 | >300 | 91 | 8 |
| 32 | F | 2 | 10.2 | CCHD s/p MBTS | 40.5 | 4.0 | 0 | NA | 176 | NA | 9 |
| 33 | F | 1 | 11.2 | CCHD s/p MBTS | 40.5 | 3.6 | 0 | 9 | >300 | >300 | 7.5 |
| 34 | M | 3 | 14.3 | CCHD s/p MBTS | 81 | 5.7 | 0 | NA | 160 | 81 | 3 |
| 35 | M | 7 | NA | Moya moya | 81 | NA | 2 | 7 | >300 | 154 | 2 |
| 36 | M | 10 | NA | Moya moya | 81 | NA | 0 | 7 | >300 | >300 | 6 |
| 37 | F | 7 | NA | Moya moya | 42.5 | NA | 0 | 11 | >300 | 118 | 6 |
| 38 | M | 13 | NA | Moya moya | 81 | NA | 1 | 1 | >300 | >300 | 14 |
| 39 | M | 10 | NA | Moya moya | 81 | NA | 2 | 4 | >300 | 187 | 8 |

**Abbreviations**: Β-thal/HbE, Beta thalassemia/ hemoglobin E disease; BT, Bleeding time; CCHD, Cyanotic congenital heart disease; HS, Hereditary spherocytosis; IA, impedance aggregometry; MBTS, Modified Blalock-Taussig Shunt; NA: not available; PDA, Patent ductus arteriosus; PFA, platelet function analyzer; s/p, status post.

The light blue box = aspirin resistant by the specific method.

* Normal platelet function on IA is defined by positive platelet aggregation >5 ohms when activated by arachidonic acid or ADP.

** Normal platelet function on PFA-200 is defined by closure time in collagen/epinephrine and collagen/ADP cartridge <180 seconds.

† Normal platelet function on bedside BT is defined by BT ≤7 seconds.
